# Supplementary material
Source: PubMed Central journal article supplement (PMC2277233)
Supplement: tjp583-0071-SD1.pdf [file tjp583-0071-SD1.pdf]

**A**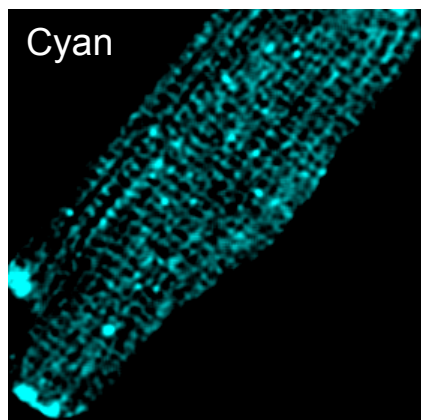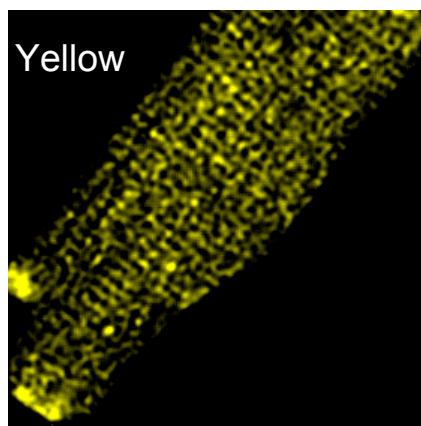20  $\mu\text{m}$ **B**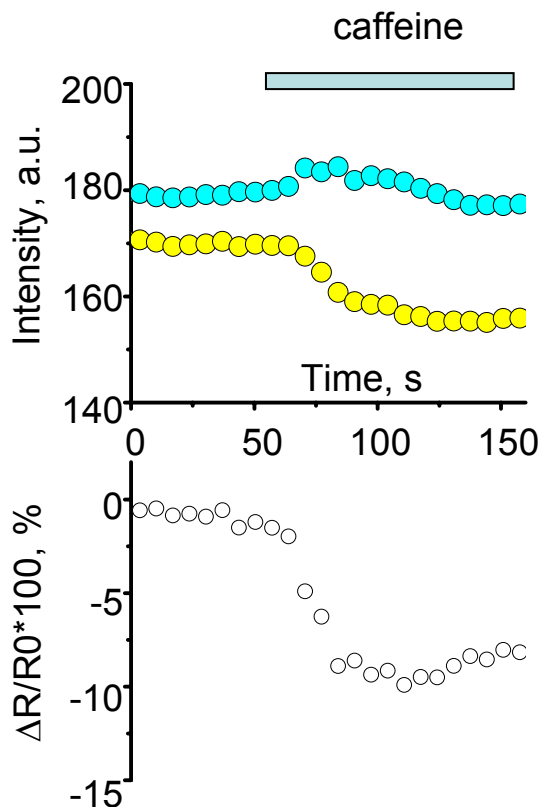

Supplemental Figure.

**A**, XY images of ventricular myocyte 48 hours after infection with adenoviral construct of cameleon YC2.1 flanked with ER-retention sequence (KDEL). **B**, Time-dependent changes of Cyan and Yellow fluorescence signals upon application of 10 mM caffeine (upper panel). Decreased FRET efficiency (lower panel) in response to caffeine reflects decreased  $[\text{Ca}^{2+}]$  sensed by the probe. This type of response consistent with probe localization in the SR compartment.
